# Supplementary material for: Slr4, a newly identified S‐layer protein from marine Gammaproteobacteria, is a major biofilm matrix component
Source: PubMed Central journal article supplement (PMC7821379; doi:10.1111/mmi.14588), 2020-09-15
Supplement: MMI-114-979-s001.pdf [file MMI-114-979-s001.pdf]

## Supplementary Figures and Text

### 8 hrs

EAR28894.1 (100%), 59,234.6 Da  
hypothetical protein PTD2\_07619 [Pseudoalteromonas tunicata D2]  
134 exclusive unique peptides, 222 exclusive unique spectra, 701 total spectra, 541/579 amino acids (93% coverage)

|            |             |            |             |             |             |
|------------|-------------|------------|-------------|-------------|-------------|
| MEIMFKKTL  | ALAITGVSV   | ANAADVKT   | TATTAVLQQT  | AIGTAKAHAK  | GTALGASGVF  |
| GTAADATNSA | NCKALAAAFYG | VSLTKADGTA | AHAVAADGSG  | GDVATFADGS  | GRELTTVHTT  |
| AANACLATVK | PVLSTTAAKD  | GLEYTQATAL | EIKPVIIVAGI | GGYKAEDTLLT | FQFSGAKLDL  |
| TKTTAPSIIV | AAAGQAGAGV  | TFDILDITDS | QIRFTVKATT  | PANDFVRGNG  | ILELSNIFLD  |
| STGLAATTSV | MVNSFGTNTS  | GTKFDESTAA | TIVSLLPQYT  | TEVTTLLLDAD | IDVVGKDRQQF |
| ANNLTADVLA | VKHTKNPTSA  | NVLVPANTTY | VVTGDFSWAY  | APSVDTNKKDG | KLSSAELMAA  |
| NVAVLAGGDD | TVKSLALNAT  | NTELTIVTNI | VGAALDATNT  | ITFNVPGYDS  | GKGTNPMISV  |
| QDFTVKVDTM | SDKSVGSKAV  | NMPSLAKTAA | GTWKLNGSVV  | VVPYVPPFGPA | TQPILRHTNA  |
| GTQTGDITVR | YMVEGVHTAW  | QSLAAAGIKD | AKPGVRDMLG  | LVTDALKGEG  | YDSTTTGFKV  |
| ALEVVTNVP  | KDVFVYGGAK  | ITAEGQDRIH | LGTFKTNVN   |             |             |

### 26 hrs

EAR28894.1 (100%), 59,234.6 Da  
hypothetical protein PTD2\_07619 [Pseudoalteromonas tunicata D2]  
223 exclusive unique peptides, 360 exclusive unique spectra, 852 total spectra, 543/579 amino acids (94% coverage)

|            |             |            |             |             |             |
|------------|-------------|------------|-------------|-------------|-------------|
| MEIMFKKTL  | ALAITGVSV   | ANAADVKT   | TATTAVLQQT  | AIGTAKAHAK  | GTALGASGVF  |
| GTAADATNSA | NCKALAAAFYG | VSLTKADGTA | AHAVAADGSG  | GDVATFADGS  | GRELTTVHTT  |
| AANACLATVK | PVLSTTAAKD  | GLEYTQATAL | EIKPVIIVAGI | GGYKAEDTLLT | FQFSGAKLDL  |
| TKTTAPSIIV | AAAGQAGAGV  | TFDILDITDS | QIRFTVKATT  | PANDFVRGNG  | ILELSNIFLD  |
| STGLAATTSV | MVNSFGTNTS  | GTKFDESTAA | TIVSLLPQYT  | TEVTTLLLDAD | IDVVGKDRQQF |
| ANNLTADVLA | VKHTKNPTSA  | NVLVPANTTY | VVTGDFSWAY  | APSVDTNKKDG | KLSSAELMAA  |
| NVAVLAGGDD | TVKSLALNAT  | NTELTIVTNI | VGAALDATNT  | ITFNVPGYDS  | GKGTNPMISV  |
| QDFTVKVDTM | SDKSVGSKAV  | NMPSLAKTAA | GTWKLNGSVV  | VVPYVPPFGPA | TQPILRHTNA  |
| GTQTGDITVR | YMVEGVHTAW  | QSLAAAGIKD | AKPGVRDMLG  | LVTDALKGEG  | YDSTTTGFKV  |
| ALEVVTNVP  | KDVFVYGGAK  | ITAEGQDRIH | LGTFKTNVN   |             |             |

### 42 hrs

EAR28894.1 (100%), 59,234.6 Da  
hypothetical protein PTD2\_07619 [Pseudoalteromonas tunicata D2]  
212 exclusive unique peptides, 343 exclusive unique spectra, 888 total spectra, 536/579 amino acids (93% coverage)

|            |             |            |             |             |             |
|------------|-------------|------------|-------------|-------------|-------------|
| MEIMFKKTL  | ALAITGVSV   | ANAADVKT   | TATTAVLQQT  | AIGTAKAHAK  | GTALGASGVF  |
| GTAADATNSA | NCKALAAAFYG | VSLTKADGTA | AHAVAADGSG  | GDVATFADGS  | GRELTTVHTT  |
| AANACLATVK | PVLSTTAAKD  | GLEYTQATAL | EIKPVIIVAGI | GGYKAEDTLLT | FQFSGAKLDL  |
| TKTTAPSIIV | AAAGQAGAGV  | TFDILDITDS | QIRFTVKATT  | PANDFVRGNG  | ILELSNIFLD  |
| STGLAATTSV | MVNSFGTNTS  | GTKFDESTAA | TIVSLLPQYT  | TEVTTLLLDAD | IDVVGKDRQQF |
| ANNLTADVLA | VKHTKNPTSA  | NVLVPANTTY | VVTGDFSWAY  | APSVDTNKKDG | KLSSAELMAA  |
| NVAVLAGGDD | TVKSLALNAT  | NTELTIVTNI | VGAALDATNT  | ITFNVPGYDS  | GKGTNPMISV  |
| QDFTVKVDTM | SDKSVGSKAV  | NMPSLAKTAA | GTWKLNGSVV  | VVPYVPPFGPA | TQPILRHTNA  |
| GTQTGDITVR | YMVEGVHTAW  | QSLAAAGIKD | AKPGVRDMLG  | LVTDALKGEG  | YDSTTTGFKV  |
| ALEVVTNVP  | KDVFVYGGAK  | ITAEGQDRIH | LGTFKTNVN   |             |             |

### 68 hrs

EAR28894.1 (100%), 59,234.6 Da  
hypothetical protein PTD2\_07619 [Pseudoalteromonas tunicata D2]  
269 exclusive unique peptides, 488 exclusive unique spectra, 1417 total spectra, 540/579 amino acids (93% coverage)

|            |             |            |             |             |             |
|------------|-------------|------------|-------------|-------------|-------------|
| MEIMFKKTL  | ALAITGVSV   | ANAADVKT   | TATTAVLQQT  | AIGTAKAHAK  | GTALGASGVF  |
| GTAADATNSA | NCKALAAAFYG | VSLTKADGTA | AHAVAADGSG  | GDVATFADGS  | GRELTTVHTT  |
| AANACLATVK | PVLSTTAAKD  | GLEYTQATAL | EIKPVIIVAGI | GGYKAEDTLLT | FQFSGAKLDL  |
| TKTTAPSIIV | AAAGQAGAGV  | TFDILDITDS | QIRFTVKATT  | PANDFVRGNG  | ILELSNIFLD  |
| STGLAATTSV | MVNSFGTNTS  | GTKFDESTAA | TIVSLLPQYT  | TEVTTLLLDAD | IDVVGKDRQQF |
| ANNLTADVLA | VKHTKNPTSA  | NVLVPANTTY | VVTGDFSWAY  | APSVDTNKKDG | KLSSAELMAA  |
| NVAVLAGGDD | TVKSLALNAT  | NTELTIVTNI | VGAALDATNT  | ITFNVPGYDS  | GKGTNPMISV  |
| QDFTVKVDTM | SDKSVGSKAV  | NMPSLAKTAA | GTWKLNGSVV  | VVPYVPPFGPA | TQPILRHTNA  |
| GTQTGDITVR | YMVEGVHTAW  | QSLAAAGIKD | AKPGVRDMLG  | LVTDALKGEG  | YDSTTTGFKV  |
| ALEVVTNVP  | KDVFVYGGAK  | ITAEGQDRIH | LGTFKTNVN   |             |             |

**Figure S1.** LC-MS/MS coverage of the EAR28894 protein. Identified peptides mapped across the entirety of the sequence, with the exception of an N-terminal segment consisting of the first 13-27 amino acid residues. Residues highlighted in green represent chemical modifications (e.g., deamidation, oxidation).

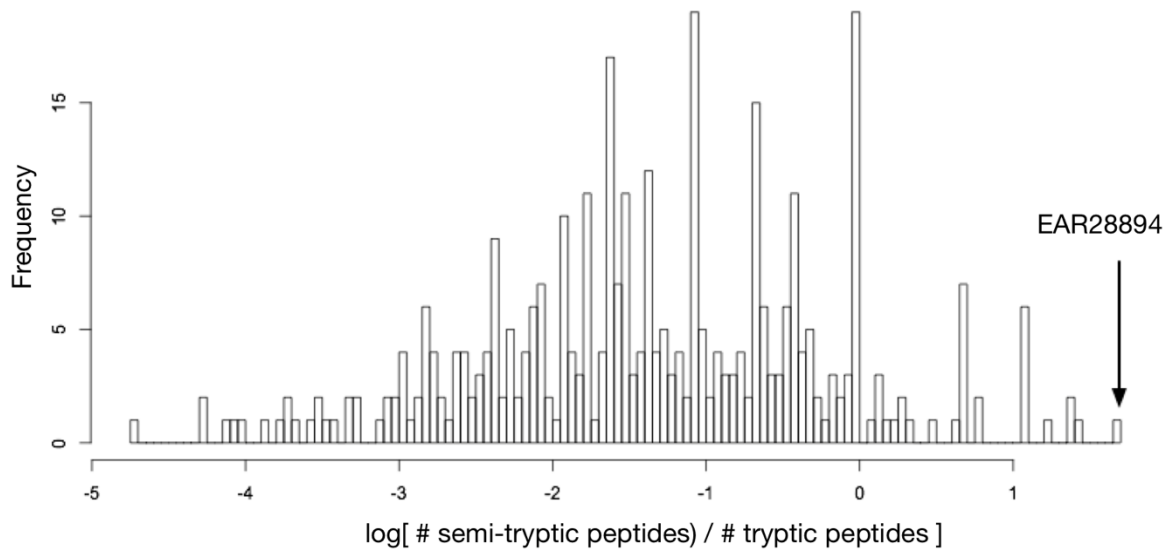

**Figure S2.** Ratio of semi-tryptic to tryptic peptides across all proteins in LC-MS/MS data. EAR28894 deviates from all other proteins in this regard, and therefore is likely to be most heavily processed by non-trypsin proteases.

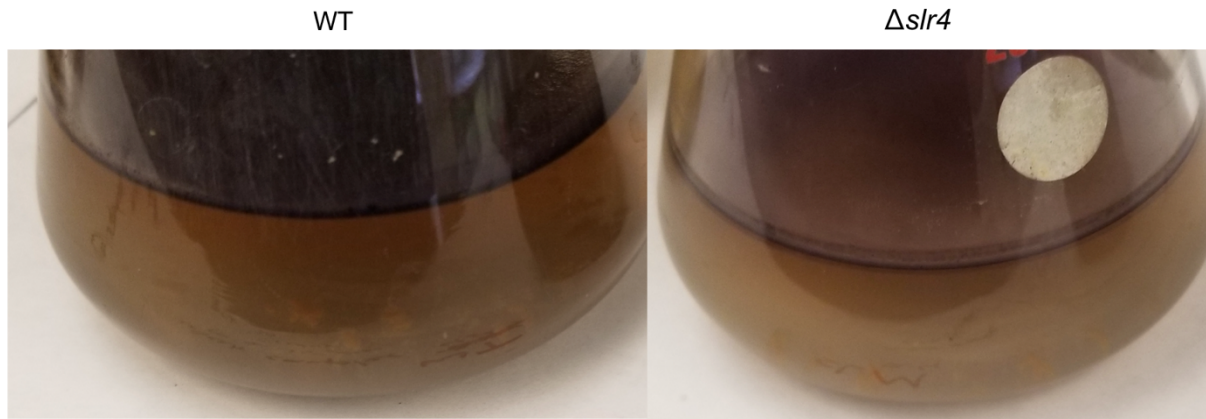

**Figure S3.** Pellicle biofilms formed by the WT vs  $\Delta slr4$  mutant strain. Liquid cultures were grown for 8 hours (shaking) in liquid Difco marine broth media, followed by 72 hours of static (non-shaking) incubation.

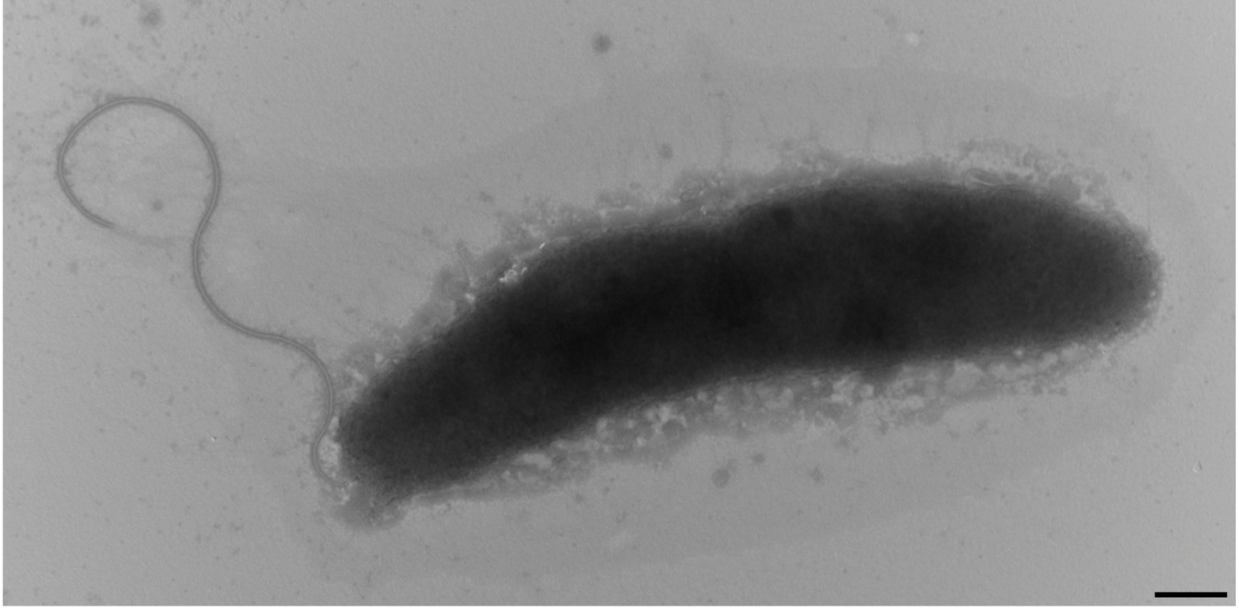

**Figure S4.** TEM micrograph of a *P. tunicata* cell revealing the presence of a putative outermost capsular layer. Scale bar = 500 nm.

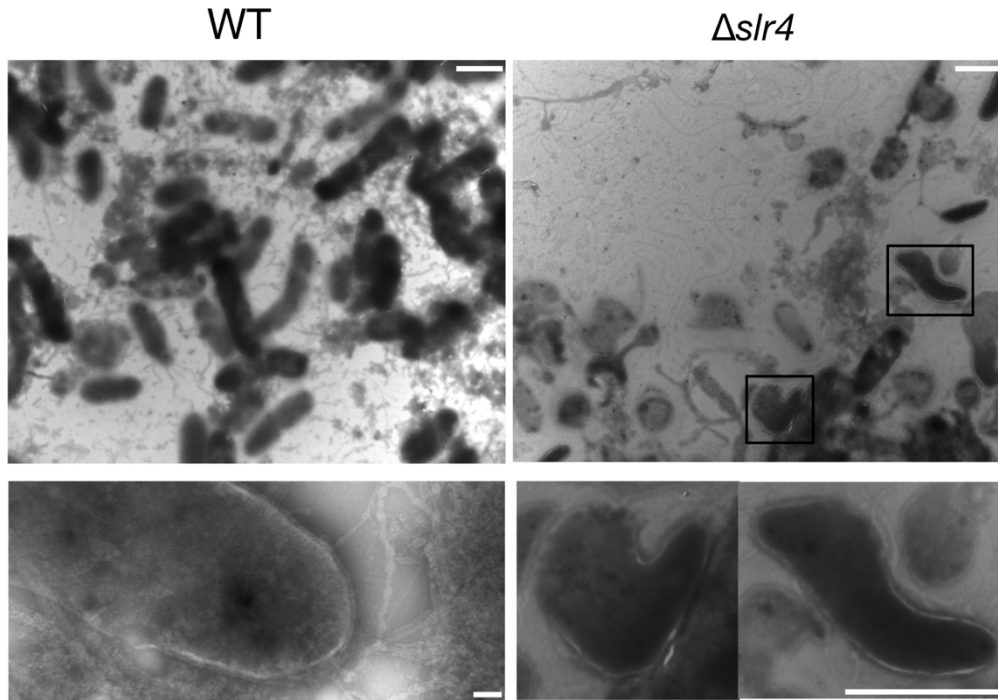

**Figure S5.** TEM micrographs of 48-hr pellicle biofilms (WT versus  $\Delta slr4$  mutant strain). Top left – dense cell clusters in the WT strain interconnected by biofilm matrix material. Bottom left – a WT cell within a biofilm with extracellular biofilm matrix including fibrous structures coated by S-layer material. Top right – image taken from a  $\Delta slr4$  biofilm showing a sparser cell distribution that is not connected by S-layer associated matrix material. Bottom right – two examples from the image above of deformed cell shapes. Scale bars are 2 microns, with the exception of the bottom left image where it is 100 nm.

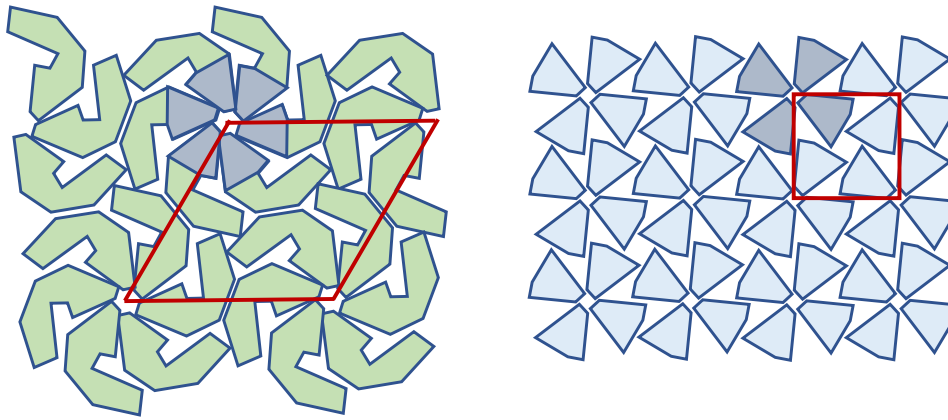

**Figure S6.** Hypothetical model of Slr4 S-layer lattice assembly (right) compared to *rsaA* S-layer assembly (left). A smaller (truncated) S-layer subunit relative to *rsaA* could alter inter-subunit interactions to result in a four-fold symmetric pattern (right) instead of a six-fold hexagonal symmetry (left). The model is consistent with the top-down view of a square lattice as observed in Figs. 3 and 4, as well as the side-view showing V-shaped cups as shown in Fig. 4.

Table S1. Top proteins identified by LC-MS/MS.

| Accession         | -10lgP        | Cov. (%)  | #Pept<br>ides | #Unique    | P<br>T<br>M | Avg.<br>Mass<br>(kDa) | Description                                |
|-------------------|---------------|-----------|---------------|------------|-------------|-----------------------|--------------------------------------------|
| <b>EAR28894.1</b> | <b>468.71</b> | <b>93</b> | <b>111</b>    | <b>110</b> | <b>Y</b>    | <b>59235</b>          | <b>hypothetical protein PTD2_07619</b>     |
| EAR29208.1        | 170.89        | 20        | 12            | 12         | Y           | 68830                 | hypothetical protein PTD2_09189            |
| EAR29563.1        | 133.95        | 8         | 3             | 3          | Y           | 60109                 | flagellin                                  |
| EAR27917.1        | 104.01        | 5         | 4             | 4          | N           | 103265                | TonB-dependent outer membrane receptor     |
| EAR28105.1        | 75.5          | 6         | 3             | 3          | N           | 61087<br>139223       | 30S ribosomal subunit protein S1           |
| EAR30644.1        | 56.2          | 0         | 2             | 2          | Y           | 8                     | fibronectin type III domain protein        |
| EAR27255.1        | 53.86         | 2         | 2             | 1          | N           | 67577                 | putative lipoprotein                       |
| EAR28194.1        | 50.54         | 3         | 2             | 2          | N           | 82187                 | TonB-dependent receptor                    |
| EAR26551.1        | 48.39         | 3         | 2             | 2          | Y           | 105969                | sensor histidine kinase/response regulator |
| EAR27983.1        | 44.82         | 3         | 1             | 1          | N           | 63152                 | putative orphan protein                    |

Table S2. Supporting peptides for EAR28894 identification by LC-MS/MS.

| Peptide                                                        | -10lgP | Mass     | L  | ppm  | m/z      | z | RT    | F | Scan | #Spec | Start | End | PTM |
|----------------------------------------------------------------|--------|----------|----|------|----------|---|-------|---|------|-------|-------|-----|-----|
| R.YMVEGVHTAWQS<br>LAAAGIK.D                                    | 119.18 | 2031.025 | 19 | -7.4 | 1016.512 | 2 | 20.76 | 2 | 3156 | 9     | 491   | 509 |     |
| K.DGLEYTQATALEI<br>KPVIVAGIGGYK.A                              | 117.52 | 2605.4   | 25 | -8.2 | 1303.697 | 2 | 22.33 | 2 | 3432 | 45    | 140   | 164 |     |
| R.YM(+15.99)VEGVH<br>TAWQSLAAAGIK.D                            | 111.23 | 2047.02  | 19 | -5.9 | 683.3431 | 3 | 20.02 | 2 | 3018 | 5     | 491   | 509 | 1   |
| R.DMLGLVTDALKG<br>EGYDSTTTGFK.V                                | 107.36 | 2418.162 | 23 | -4.7 | 1210.083 | 2 | 24.78 | 2 | 3863 | 13    | 517   | 539 |     |
| R.HTNAGTQTGDITV<br>R.Y                                         | 104.91 | 1469.722 | 14 | -6.2 | 735.8639 | 2 | 11.4  | 2 | 1422 | 4     | 477   | 490 |     |
| K.GTNPMISVQDFTV<br>K.V                                         | 100.89 | 1535.765 | 14 | -4.9 | 768.8862 | 2 | 20.01 | 2 | 3017 | 4     | 413   | 426 |     |
| K.ADGTAAHVAAD<br>GSGGDVATFADGSG<br>R.E                         | 97.12  | 2403.069 | 27 | -7.9 | 802.0238 | 3 | 14.93 | 2 | 2057 | 9     | 86    | 112 |     |
| R.DM(+15.99)LGLVT<br>DALKGEGYDSTTTG<br>FK.V                    | 92.65  | 2434.157 | 23 | -6.5 | 1218.078 | 2 | 20.99 | 2 | 3197 | 6     | 517   | 539 | 1   |
| R.QQFAN(+.98)NLTA<br>DVLAVK.H                                  | 91.34  | 1631.852 | 15 | -6.5 | 816.9279 | 2 | 19.91 | 2 | Ta   | 3     | 298   | 312 | 2   |
| K.VALEVVTNVPSK<br>DVFVYGGAK.I                                  | 90.54  | 2191.189 | 21 | -7.8 | 1096.593 | 2 | 19.65 | 2 | 2941 | 18    | 540   | 560 |     |
| K.GTNPM(+15.99)ISV<br>QDFTVK.V                                 | 88.79  | 1551.76  | 14 | -6.3 | 776.8825 | 2 | 18.42 | 2 | 2717 | 3     | 413   | 426 | 1   |
| A.TALEIKPVIVAGIG<br>GYK.A                                      | 88.03  | 1728.019 | 17 | -8.1 | 865.0095 | 2 | 19.96 | 2 | 3005 | 2     | 148   | 164 |     |
| R.YMVEGVHTAWQ(+<br>+98)SLAAAGIK.D                              | 88     | 2032.009 | 19 | -3.6 | 1017.008 | 2 | 21.43 | 2 | 3275 | 3     | 491   | 509 | 2   |
| K.LSSAELMAANVA<br>VLAGDDTVK.S                                  | 87.8   | 2131.083 | 22 | -5.6 | 1066.543 | 2 | 22.34 | 2 | 3433 | 4     | 352   | 373 |     |
| K.DGLEYTQ(+.98)AT<br>ALEIKPVIVAGIGGY<br>K.A                    | 87.28  | 2606.384 | 25 | 10.3 | 652.61   | 4 | 22.38 | 2 | 3441 | 12    | 140   | 164 | 2   |
| R.QQFANNLTADVL<br>AVK.H                                        | 84.32  | 1630.868 | 15 | -3.8 | 816.4381 | 2 | 20.18 | 2 | 3053 | 4     | 298   | 312 |     |
| K.TSVTATTAVLQQT<br>AIGTAK.A                                    | 83.11  | 1861.016 | 19 | -7.8 | 931.5078 | 2 | 18.03 | 2 | 2646 | 3     | 28    | 46  |     |
| R.DMLGLVTDALK.G<br>K.AEDTLTFQFSGAK<br>.L                       | 83.06  | 1174.627 | 11 | -5.3 | 588.3175 | 2 | 23.81 | 2 | 3689 | 7     | 517   | 527 |     |
| K.ALAAFYGVSLTK.<br>A                                           | 82.59  | 1413.678 | 13 | -4.9 | 707.8427 | 2 | 19.86 | 2 | 2984 | 31    | 165   | 177 |     |
| K.LSSAELM(+15.99)<br>AANVAVLAGGDDT<br>VK.S                     | 82.53  | 1239.686 | 12 | -6.6 | 620.8463 | 2 | 19.91 | 2 | 2993 | 2     | 74    | 85  |     |
| R.ELTTVHTTAANAC<br>(+57.02)LATVKPVLS<br>TTAAK.D                | 81.88  | 2147.078 | 22 | 0.2  | 1074.546 | 2 | 19.61 | 2 | 2933 | 4     | 352   | 373 | 1   |
| R.Q(+.98)QFANNLTA<br>DVLAVK.H                                  | 81.48  | 2768.474 | 27 | -5.8 | 693.1218 | 4 | 16.99 | 2 | 2429 | 5     | 113   | 139 | 3   |
| K.DRQQFANNLTAD<br>VLAVK.H                                      | 81.46  | 1631.852 | 15 | -6.5 | 816.9279 | 2 | 20.55 | 2 | 3119 | 2     | 298   | 312 | 2   |
| K.LNGSVVVVPPYVPP<br>GPATQPILR.H                                | 80.18  | 1901.996 | 17 | -4.4 | 952.001  | 2 | 19.83 | 2 | 2976 | 4     | 296   | 312 |     |
| K.LN(+.98)GSVVVPP<br>YVFPGPATQPILR.H                           | 79.7   | 2322.31  | 22 | 3.3  | 775.1131 | 3 | 23.76 | 2 | 3680 | 3     | 455   | 476 |     |
| K.VALEVVTNVPSK.<br>D                                           | 79.29  | 2323.294 | 22 | -4.5 | 775.4351 | 3 | 24.08 | 2 | 3738 | 7     | 455   | 476 | 2   |
| T.ALEIKPVIVAGIGG<br>YK.A                                       | 78.86  | 1254.718 | 12 | -3.7 | 419.2451 | 3 | 16.45 | 2 | 2334 | 13    | 540   | 551 |     |
| K.GTALGASGVFGT<br>AADATNSANCKA.L<br>Y.MVEGVHTAWQSL<br>AAAGIK.D | 77.2   | 1626.971 | 16 | -5.8 | 543.3278 | 3 | 19.84 | 2 | 2979 | 4     | 149   | 164 |     |
| R.HTN(+.98)AGTQTG<br>DITVR.Y                                   | 76.07  | 2154.001 | 24 | -5.8 | 719.0035 | 3 | 17.55 | 2 | 2553 | 4     | 51    | 74  |     |
| K.TTAPSTVAAAGQ<br>AGAGVTFDILDITDS<br>QIR.F                     | 75.15  | 1867.961 | 18 | -2.8 | 934.9854 | 2 | 20.84 | 2 | 3171 | 2     | 492   | 509 |     |
| H.AVAADGSGGDVA<br>TFADGSGRE                                    | 74.87  | 1470.706 | 14 | -5.4 | 736.3564 | 2 | 11.78 | 2 | 1499 | 3     | 477   | 490 | 2   |
| A.ANACLATVKPVL<br>STTAAK.D                                     | 74.7   | 3059.577 | 31 | -8.3 | 1020.858 | 3 | 25.6  | 2 | 4007 | 17    | 183   | 213 |     |
| R.IHLGTFK.T                                                    | 74.54  | 1779.802 | 20 | -7.6 | 890.9016 | 2 | 14.95 | 2 | 2061 | 2     | 93    | 112 |     |
|                                                                | 73.72  | 1757.971 | 18 | -6.2 | 879.9873 | 2 | 15.75 | 2 | 2208 | 4     | 122   | 139 |     |
|                                                                | 71.1   | 814.4701 | 7  | 0.2  | 408.2424 | 2 | 14.68 | 2 | 2009 | 5     | 569   | 575 |     |



|                                                                 |          |          |     |          |          |       |       |      |      |     |       |       |
|-----------------------------------------------------------------|----------|----------|-----|----------|----------|-------|-------|------|------|-----|-------|-------|
| K.FDESTAATIVSLLP<br>QYTTEVTLLDADI<br>DVGKDR.Q                   | 70.58    | 3696.862 | 34  | -5.9     | 1233.287 | 3     | 30.27 | 2    | 4799 | 18  | 264   | 297   |
| K.NPITSANVLVPAN(+98)TTYVVTGDFS<br>WAYAPSVDTNK.D                 | 70.2     | 3499.678 | 33  | -2.1     | 1167.564 | 3     | 23.2  | 2    | 3585 | 1   | 316   | 348 2 |
| K.LSSAELMAAN(+98)VAVLAGGDDTVK.S                                 | 70.11    | 2132.067 | 22  | -4       | 711.6935 | 3     | 22.34 | 2    | 3434 | 1   | 352   | 373 2 |
| R.GNGILELSNIFLDS<br>TGLAATTSVMVNSF<br>GTNTSGTK.F                | 68.95    | 3616.793 | 36  | -5.8     | 1206.598 | 3     | 30.13 | 2    | 4775 | 4   | 228   | 263   |
| N.AC(+57.02)LATVK<br>PVLSTTAAK.D                                | 68.72    | 1629.912 | 16  | -4.3     | 544.3091 | 3     | 15.44 | 2    | 2147 | 4   | 124   | 139 3 |
| R.QQ(+98)FANNLTA<br>DVLAVK.H                                    | 68.34    | 1631.852 | 15  | -6.5     | 816.9279 | 2     | 20.58 | 2    | 3125 | 1   | 298   | 312 2 |
| K.AVNMPSLAKTAA<br>GTWKLNGSVVVVP<br>YVFPGPATQPILR.H              | 67.65    | 3949.165 | 38  | -5.7     | 988.2929 | 4     | 24.14 | 2    | 3749 | 3   | 439   | 476   |
| A.TTSVMVNSFSGTNT<br>SGTK.F                                      | 67.28    | 1730.815 | 17  | -7.9     | 866.4077 | 2     | 15.57 | 2    | 2172 | 2   | 247   | 263   |
| R.ELTTVHTTAAAC<br>(+57.02).L                                    | 66.89    | 1387.64  | 13  | -5.7     | 694.8234 | 2     | 12.19 | 2    | 1575 | 2   | 113   | 125 3 |
| K.FDESTAATIVSLLP<br>Q(+98)YTTEVTLL<br>DADIDVGKDR.Q              | 65.37    | 3697.846 | 34  | -2.4     | 1233.62  | 3     | 30.34 | 2    | 4811 | 5   | 264   | 297 2 |
| R.HTNAGTQGDITV<br>RYMVEGVHTAWQS<br>LAAAGIK.D                    | 65.29    | 3482.737 | 33  | -2       | 697.5532 | 5     | 24.95 | 2    | 3895 | 5   | 477   | 509   |
| K.SLALNATNELTI<br>VTN(+98)IVGAALD<br>ATN(+98)ITTFNVP<br>YDSGK.G | 65.16    | 3981.011 | 39  | 3.6      | 1328.016 | 3     | 33.66 | 2    | 5375 | 2   | 374   | 412 2 |
| D.GTAAHAVAADGS<br>GGDVATFADGSGR.<br>E                           | 64.86    | 2217.005 | 25  | -4.8     | 740.0052 | 3     | 14.56 | 2    | 1985 | 4   | 88    | 112   |
| K.SLALNATNELTI<br>VTN(+98)IVGAALD<br>ATNTITFNVPYDS<br>GK.G      | 64.42    | 3980.027 | 39  | -8.4     | 1327.672 | 3     | 34.23 | 2    | 5471 | 1   | 374   | 412 2 |
| K.NPITSANVLVPANT<br>TYVVTGDFSWAYA<br>PSVDTNK.D                  | 64.3     | 3498.694 | 33  | -6.7     | 1167.231 | 3     | 23.25 | 2    | 3594 | 2   | 316   | 348   |
| K.ATTPAN(+98)DFV<br>R.G                                         | 63.73    | 1091.525 | 10  | -3.4     | 546.7678 | 2     | 13.32 | 2    | 1769 | 4   | 218   | 227 2 |
| K.TAAGTWK.L                                                     | 63.26    | 733.3759 | 7   | -3.9     | 367.6938 | 2     | 10.43 | 2    | 1257 | 1   | 448   | 454   |
| K.DVFVYGGAK.I<br>K.DRQQFAN(+98)N<br>LTADVLAVK.H                 | 62.78    | 954.481  | 9   | -3.9     | 478.2459 | 2     | 15.63 | 2    | 2183 | 2   | 552   | 560   |
| L.GLVTDALKGEGY<br>DSTTTGFK.V                                    | 62.56    | 1902.98  | 17  | -6.8     | 952.4907 | 2     | 19.23 | 2    | 2867 | 1   | 296   | 312 2 |
| K.AVNMPSLAKTAA<br>GTWKLN(+98)GSVV<br>VVPYVFPGPATQPIL<br>R.H     | 62.38    | 2059.011 | 20  | -7.4     | 1030.505 | 2     | 24.75 | 2    | 3857 | 2   | 520   | 539   |
| D.GSGGDVATFADG<br>SGR.E                                         | 61.37    | 3950.149 | 38  | 1.1      | 988.5457 | 4     | 24.17 | 2    | 3755 | 1   | 439   | 476 2 |
| K.TAAGTWKLNGSV<br>VVVPYVFPGPATQPI<br>LR.H                       | 60.93    | 1352.596 | 15  | -7.6     | 677.2999 | 2     | 13.8  | 2    | 1850 | 2   | 98    | 112   |
| K.GTNPMSVQ(+98)<br>DFTVK.V                                      | 60.92    | 3037.675 | 29  | -6.8     | 1013.559 | 3     | 23.78 | 2    | 3684 | 3   | 448   | 476   |
| 60.66                                                           | 1536.749 | 14       | -4  | 769.3789 | 2        | 20.63 | 2     | 3133 | 2    | 413 | 426 2 |       |
| K.PVIVAGIGYK.A<br>N.GSVVVVPYVFPGP<br>ATQPILR.H                  | 60.45    | 1072.628 | 11  | -7.3     | 537.3174 | 2     | 17.27 | 2    | 2490 | 2   | 154   | 164   |
| C.LATVKPVLSTTAA<br>K.D                                          | 60.23    | 2095.183 | 20  | -7.2     | 1048.591 | 2     | 23.46 | 2    | 3629 | 4   | 457   | 476   |
| R.HTNAGTQ(+98)TG<br>DITVRYMVEGVHTA<br>WQSLAAAGIK.D              | 59.96    | 1398.845 | 14  | -5.3     | 700.4259 | 2     | 14.29 | 2    | 1938 | 4   | 126   | 139   |
| A.AGQAGAGVTFDIL<br>DITDSQIR.F                                   | 59.69    | 3483.721 | 33  | -1.1     | 871.9364 | 4     | 24.94 | 2    | 3893 | 1   | 477   | 509 2 |
| K.NPITSANVLVPANT<br>TYVVTGDFSWAYA<br>PSVDTNKDGK.L               | 59.53    | 2147.086 | 21  | -3.5     | 1074.546 | 2     | 23.66 | 2    | 3663 | 4   | 193   | 213   |
| K.VALEVVTNVP<br>DVF.V                                           | 58.83    | 3798.838 | 36  | -3.3     | 1267.282 | 3     | 22.42 | 2    | 3449 | 2   | 316   | 351   |
| 58.61                                                           | 1615.882 | 15       | -11 | 808.9395 | 2        | 20.41 | 2     | 3095 | 2    | 540 | 554   |       |

|                                                                                |       |          |    |       |          |   |       |   |      |   |     |       |
|--------------------------------------------------------------------------------|-------|----------|----|-------|----------|---|-------|---|------|---|-----|-------|
| K.SLALNATNELTI<br>VTNIVGAALDATNT<br>ITFNVPGYDSGK.G<br>D.ATNTITFNVPGYD<br>SGK.G | 58.31 | 3979.043 | 39 | -7.8  | 1327.344 | 3 | 33.45 | 2 | 5339 | 5 | 374 | 412   |
| R.QQFANN(+.98)LTA<br>DVLAVK.H                                                  | 57.54 | 1683.81  | 16 | -7.7  | 842.906  | 2 | 18.43 | 2 | 2718 | 2 | 397 | 412   |
| N.ACLATVKPVLSTT<br>AAK.D                                                       | 57.49 | 1631.852 | 15 | -3.1  | 544.9562 | 3 | 19.97 | 2 | 3007 | 1 | 298 | 312 2 |
| K.AVNMPSLAK.T<br>A.HAVAADGSGGDV<br>ATFADGSGR.E                                 | 57.04 | 1572.891 | 16 | -7.2  | 787.447  | 2 | 15.05 | 2 | 2079 | 4 | 124 | 139   |
| F.GPATQPILR.H<br>V.VVPYVFPGPATQP<br>ILR.H                                      | 56.55 | 929.5004 | 9  | -5.3  | 310.8391 | 3 | 15.31 | 2 | 2125 | 3 | 439 | 447   |
| R.DM(+15.99)LGLVT<br>DALK.G                                                    | 55.12 | 1916.861 | 21 | -2.9  | 639.9592 | 3 | 14.06 | 2 | 1896 | 3 | 92  | 112   |
| K.LN(+.98)GSVVVVP<br>YVFPGPATQ(+.98)PI<br>LR.H                                 | 54.83 | 951.5501 | 9  | -7.8  | 476.7786 | 2 | 13.55 | 2 | 1809 | 2 | 468 | 476   |
| R.DMLGLVTDALKEG<br>EGYD.S                                                      | 54.53 | 1752.993 | 16 | -11   | 877.494  | 2 | 26.21 | 2 | 4112 | 1 | 461 | 476   |
| V.TDALKGEGYDST<br>TTGFK.V                                                      | 54.41 | 1190.622 | 11 | -3.5  | 596.316  | 2 | 19.54 | 2 | 2921 | 1 | 517 | 527 1 |
| L.PQYTTTEVTLLDA<br>DIDVGKDR.Q                                                  | 54.03 | 2324.278 | 22 | 3.9   | 582.079  | 4 | 24.15 | 2 | 3752 | 4 | 455 | 476 2 |
| V.EGVHTAWQSLAA<br>AGIK.D                                                       | 53.73 | 1695.803 | 16 | -10.3 | 848.8998 | 2 | 25.56 | 2 | 4001 | 2 | 517 | 532   |
| L.EVVTVNPSKDVVFV<br>YGGAK.I                                                    | 53.2  | 1789.837 | 17 | -5.7  | 895.9207 | 2 | 24.82 | 2 | 3872 | 1 | 523 | 539   |
| K.DAKPGVR.D<br>R.YMVEGVHTAWQS<br>LAAAGIKDAKPGVR<br>.D                          | 52.08 | 2349.17  | 21 | -7.6  | 1175.583 | 2 | 29.93 | 2 | 4741 | 2 | 277 | 297   |
| K.ATTPANDFVR.G                                                                 | 51.6  | 1637.853 | 16 | -5.4  | 819.9291 | 2 | 20.86 | 2 | 3175 | 1 | 494 | 509   |
| V.PFGPATQPILR.H<br>K.DRQ(+.98)QFANN<br>LTADVLAVK.H                             | 51.3  | 1907.999 | 18 | -6.5  | 955.0007 | 2 | 19.73 | 2 | 2958 | 2 | 543 | 560   |
| A.LEVVTVNPSK.D<br>K.AVN(+.98)MPSLA<br>K.T                                      | 50.41 | 741.4133 | 7  | -0.5  | 248.1449 | 3 | 5.63  | 2 | 415  | 3 | 510 | 516   |
| K.GEGYDSTTTGFK.<br>V                                                           | 50.16 | 2754.428 | 26 | -4.4  | 689.6111 | 4 | 19.1  | 2 | 2844 | 2 | 491 | 516   |
| N.NLTADVLAVK.H<br>V.PYVFPGPATQPILR<br>.H                                       | 50.01 | 1090.541 | 10 | -1.8  | 364.5202 | 3 | 14.2  | 2 | 1922 | 4 | 218 | 227   |
| R.ELTTVHTTAAN.A                                                                | 49.77 | 1195.671 | 11 | -5.3  | 598.8397 | 2 | 23.85 | 2 | 3698 | 3 | 466 | 476   |
| K.VDTMSDK.S                                                                    | 49.75 | 1902.98  | 17 | -6.8  | 952.4907 | 2 | 19.29 | 2 | 2877 | 1 | 296 | 312 2 |
| K.ITAEGQDR.I<br>K.LN(+.98)GSVVVVP<br>YVFPGPA.T                                 | 49.66 | 1084.613 | 10 | -4    | 543.3115 | 2 | 16.52 | 2 | 2346 | 1 | 542 | 551   |
| K.PVLSTTAAK.D<br>R.YMVEGVHTAWQS<br>.L                                          | 49.63 | 930.4844 | 9  | 3.3   | 466.251  | 2 | 14.94 | 2 | 2060 | 1 | 439 | 447 2 |
| K.AVNM(+15.99)PSL<br>AKTAAGTWKLNLS<br>VVVVPYVFPGPATQ<br>PILR.H                 | 49.62 | 1261.546 | 12 | -5.1  | 631.7772 | 2 | 13.02 | 2 | 1718 | 2 | 528 | 539   |
| N.AGTQTDITVR.Y<br>K.TTAPSITVAAAGQ<br>(+.98)AGAGVTFDIL<br>DITDSQIR.F            | 49.32 | 1042.602 | 10 | -7.3  | 522.3046 | 2 | 17.91 | 2 | 2623 | 2 | 303 | 312   |
| K.AVN(+.98)MPSLA<br>K.T                                                        | 48.9  | 1554.856 | 14 | -6.9  | 778.4298 | 2 | 26.27 | 2 | 4122 | 4 | 463 | 476   |
| K.AVNM(+15.99)PSL<br>AKTAAGTWKLNLS<br>VVVVPYVFPGPATQ<br>PILR.H                 | 48.88 | 1156.572 | 11 | -0.4  | 579.2932 | 2 | 11.49 | 2 | 1445 | 2 | 113 | 123   |
| R.YMVEGVHTAWQ(+<br>+.98)SLAAAGIKDAK<br>PGVR.D                                  | 48.07 | 794.348  | 7  | -4    | 398.1797 | 2 | 7.75  | 2 | 803  | 2 | 427 | 433   |
| K.LN(+.98)GSVVVVP<br>YVFPGPA.T                                                 | 48.07 | 794.348  | 7  | -4    | 398.1797 | 2 | 7.75  | 2 | 803  | 2 | 427 | 433   |
| K.PVLSTTAAK.D<br>R.YMVEGVHTAWQS<br>.L                                          | 47.35 | 888.4301 | 8  | -0.9  | 445.2219 | 2 | 8.25  | 2 | 888  | 3 | 561 | 568   |
| K.AVNM(+15.99)PSL<br>AKTAAGTWKLNLS<br>VVVVPYVFPGPATQ<br>PILR.H                 | 46.99 | 1614.866 | 16 | -8.8  | 808.433  | 2 | 24.49 | 2 | 3810 | 2 | 455 | 470 2 |
| N.AGTQTDITVR.Y<br>K.TTAPSITVAAAGQ<br>(+.98)AGAGVTFDIL<br>DITDSQIR.F            | 46.9  | 886.5123 | 9  | -4.6  | 444.2614 | 2 | 11.61 | 2 | 1469 | 2 | 131 | 139   |
| K.AVN(+.98)MPSLA<br>K.T                                                        | 46.07 | 1406.629 | 12 | -3.2  | 704.3195 | 2 | 17.23 | 2 | 2481 | 1 | 491 | 502   |
| K.AVNM(+15.99)PSL<br>AKTAAGTWKLNLS<br>VVVVPYVFPGPATQ<br>PILR.H                 | 45.14 | 3965.16  | 38 | -7.2  | 992.2901 | 4 | 23.28 | 2 | 3599 | 1 | 439 | 476 1 |
| N.AGTQTDITVR.Y<br>K.TTAPSITVAAAGQ<br>(+.98)AGAGVTFDIL<br>DITDSQIR.F            | 44.77 | 1117.573 | 11 | -4.3  | 559.7913 | 2 | 12.11 | 2 | 1560 | 2 | 480 | 490   |
| K.AVN(+.98)MPSLA<br>K.T                                                        | 44.21 | 3060.562 | 31 | 5     | 1021.2   | 3 | 46.37 | 2 | 7513 | 4 | 183 | 213 2 |
| R.YMVEGVHTAWQ(+<br>+.98)SLAAAGIKDAK<br>PGVR.D                                  | 44.14 | 945.4954 | 9  | -4.3  | 473.7529 | 2 | 11.52 | 2 | 1451 | 2 | 439 | 447 1 |
| K.AVNM(+15.99)PSL<br>AKTAAGTWKLNLS<br>VVVVPYVFPGPATQ<br>PILR.H                 | 43.22 | 2755.412 | 26 | 6.1   | 552.093  | 5 | 19.08 | 2 | 2841 | 1 | 491 | 516 2 |

|                                                                                     |       |          |    |       |          |   |       |   |      |   |     |     |      |
|-------------------------------------------------------------------------------------|-------|----------|----|-------|----------|---|-------|---|------|---|-----|-----|------|
| K.SLALNATNELTI<br>VTNIVGAALDATN(+<br>.98)TITFN(+.98)VPG<br>YDSGK.G                  | 43.18 | 3981.011 | 39 | 3.6   | 1328.016 | 3 | 33.59 | 2 | 5363 | 1 | 374 | 412 | 2    |
| T.PAN(+.98)DFVR.G<br>L.ATVKPVLSTTAAK<br>.D                                          | 42.92 | 818.3922 | 7  | 1.5   | 410.204  | 2 | 13.36 | 2 | 1776 | 2 | 221 | 227 | 2    |
| T.TPANDFVR.G<br>E.VVTNVPSKDFV<br>YGGAK.I                                            | 41.7  | 918.4559 | 8  | -7.9  | 460.2316 | 2 | 14.13 | 2 | 1908 | 1 | 220 | 227 |      |
| V.VPYVFPGPATQPI<br>LR.H                                                             | 41.56 | 1778.957 | 17 | -9.1  | 890.4775 | 2 | 19.76 | 2 | 2964 | 1 | 544 | 560 |      |
| G.SVVVVPYVFPGPA<br>TQPILR.H                                                         | 41.44 | 1653.924 | 15 | -12.5 | 827.959  | 2 | 26.24 | 2 | 4117 | 1 | 462 | 476 |      |
| T.VKPVLSTTAAK.D<br>V.ALEVVTNVPSKD<br>VFVYGGAK.I                                     | 41.16 | 2038.162 | 19 | -5.9  | 1020.082 | 2 | 23.55 | 2 | 3645 | 2 | 458 | 476 |      |
| K.VALEVVTN(+.98)<br>VPSKDFVYGGAK.I                                                  | 40.8  | 1113.676 | 11 | -2.1  | 372.2318 | 3 | 11.76 | 2 | 1495 | 2 | 129 | 139 |      |
| R.GNGILELSNIFLDS<br>TGLAATTSVM(+15.9<br>9)VNSFGTN(+.98)TS<br>GTK.F                  | 40.62 | 2092.12  | 20 | -9.6  | 1047.057 | 2 | 19.74 | 2 | 2960 | 1 | 541 | 560 |      |
| G.GDVATFADGSGR.<br>E                                                                | 40.6  | 2192.173 | 21 | -3.4  | 1097.09  | 2 | 21.73 | 2 | 3326 | 4 | 540 | 560 | 2    |
| D.GLEYTQATALEIK<br>PVIVAGIGGYK.A                                                    | 40.27 | 3633.772 | 36 | -0.2  | 1817.893 | 2 | 27.88 | 2 | 4394 | 1 | 228 | 263 | 1; 2 |
| K.LNGSVVVVPYVFP<br>GPATQ(+.98)PILR.H                                                | 39.83 | 1151.521 | 12 | -8.4  | 576.7628 | 2 | 13.59 | 2 | 1815 | 1 | 101 | 112 |      |
| M.ISVQDFTVK.V                                                                       | 39.54 | 2490.373 | 24 | -2.3  | 831.1298 | 3 | 21.76 | 2 | 3331 | 2 | 141 | 164 |      |
| T.PANDFVR.G                                                                         | 39.43 | 2323.294 | 22 | 1.3   | 581.8315 | 4 | 23.86 | 2 | 3699 | 1 | 455 | 476 | 2    |
| N.PMISVQDFTVK.V<br>R.FTVKATTPANDFV<br>R.G                                           | 39.06 | 1035.56  | 9  | -4.1  | 518.7852 | 2 | 17.83 | 2 | 2609 | 2 | 418 | 426 |      |
| N.PM(+15.99)ISVQDF<br>TVK.V                                                         | 37.85 | 817.4082 | 7  | -3.1  | 409.7101 | 2 | 14.13 | 2 | 1907 | 1 | 221 | 227 |      |
| N.IFLDSTGLAATTS<br>VMVNSFGTNTSGTK<br>.F                                             | 37.77 | 1263.653 | 11 | -6.5  | 632.8298 | 2 | 20.09 | 2 | 3035 | 2 | 416 | 426 |      |
| R.YM(+15.99)VEGVH<br>TAWQS.L                                                        | 37.52 | 1565.82  | 14 | -7.5  | 783.9115 | 2 | 16.27 | 2 | 2300 | 1 | 214 | 227 |      |
| K.VALEVVTNVPSK<br>D.V                                                               | 37.07 | 1279.648 | 11 | -2.5  | 640.8298 | 2 | 18.61 | 2 | 2753 | 1 | 416 | 426 | 1    |
| R.YMVEGVHTAWQS<br>LAA.A                                                             | 36.89 | 2719.337 | 27 | -6.2  | 907.4474 | 3 | 23.66 | 2 | 3662 | 1 | 237 | 263 |      |
| K.ITAEGQ(+.98)DR.I                                                                  | 35.71 | 1422.624 | 12 | -6.5  | 712.3146 | 2 | 16.29 | 2 | 2304 | 1 | 491 | 502 | 1    |
| A.TQPILR.H                                                                          | 35.24 | 1369.745 | 13 | -6.3  | 685.8755 | 2 | 16.63 | 2 | 2366 | 1 | 540 | 552 |      |
| K.LDLTK.T<br>V.VVVPYVFPGPATQ<br>PILR.H                                              | 35.01 | 1661.787 | 15 | -6.7  | 831.8953 | 2 | 20.16 | 2 | 3048 | 2 | 491 | 505 |      |
| K.TTAPSITVAAAGQ<br>AGAGVTFDILDITDS<br>Q(+.98)IR.F                                   | 34.15 | 889.4141 | 8  | -1    | 445.7139 | 2 | 8.79  | 2 | 979  | 1 | 561 | 568 | 2    |
| A.TTPANDFVR.G<br>R.GNGILELSNIFLDS<br>TGLAATTSVM(+15.9<br>9)VN(+.98)SFGTNTS<br>GTK.F | 33.85 | 726.4388 | 6  | -3.5  | 364.2254 | 2 | 12.07 | 2 | 1553 | 2 | 471 | 476 |      |
| A.NAC(+57.02)LATV<br>KPVLSTTAAK.D                                                   | 33.84 | 588.3483 | 5  | -7.5  | 295.1792 | 2 | 11.95 | 2 | 1529 | 2 | 178 | 182 |      |
| N.VAVLAGDDTVK<br>.S                                                                 | 33.75 | 1852.061 | 17 | -7.2  | 927.0311 | 2 | 26.2  | 2 | 4111 | 1 | 460 | 476 |      |
| R.ELTTVHTAANA.<br>C                                                                 | 32.91 | 3060.562 | 31 | 5     | 1021.2   | 3 | 46.71 | 2 | 7569 | 3 | 183 | 213 | 2    |
| D.TLTFQFSGAK.L                                                                      | 32.67 | 1019.504 | 9  | -4.7  | 510.7567 | 2 | 13.85 | 2 | 1859 | 1 | 219 | 227 |      |
| D.VLAVK.H<br>V.PSKDFVYGGAK.<br>I                                                    | 32.26 | 3633.772 | 36 | -5.9  | 1212.257 | 3 | 27.87 | 2 | 4392 | 1 | 228 | 263 | 1; 2 |
|                                                                                     | 32.25 | 1743.955 | 17 | -6    | 872.9797 | 2 | 15.66 | 2 | 2191 | 1 | 123 | 139 | 3    |
|                                                                                     | 31.78 | 1143.614 | 12 | -9.1  | 572.8088 | 2 | 14.06 | 2 | 1895 | 2 | 362 | 373 |      |
|                                                                                     | 31.73 | 1227.61  | 12 | -5.2  | 614.8088 | 2 | 12.26 | 2 | 1587 | 1 | 113 | 124 |      |
|                                                                                     | 31.72 | 1098.571 | 10 | -7.2  | 550.2888 | 2 | 18.03 | 2 | 2645 | 2 | 168 | 177 |      |
|                                                                                     | 31.7  | 528.3635 | 5  | -3.2  | 265.1882 | 2 | 10.56 | 2 | 1281 | 1 | 308 | 312 |      |
|                                                                                     | 31.19 | 1266.661 | 12 | -11.4 | 634.3304 | 2 | 19.72 | 2 | 2957 | 1 | 549 | 560 |      |

|                                  |       |          |    |       |          |   |       |   |      |   |     |          |
|----------------------------------|-------|----------|----|-------|----------|---|-------|---|------|---|-----|----------|
| I.HLGTFK.T                       | 31.06 | 701.386  | 6  | -3.1  | 351.6992 | 2 | 14.66 | 2 | 2005 | 2 | 570 | 575      |
| R.GNGILELSNIFLDS                 |       |          |    |       |          |   |       |   |      |   |     |          |
| TGLAATTSVM(+15.99)VNSFGTNTSGTK.F | 30.98 | 3632.788 | 36 | -7.2  | 1211.928 | 3 | 27.78 | 2 | 4376 | 1 | 228 | 263 1    |
| K.AEDTLTFQ(+.98)FSGAK.L          | 30.85 | 1414.662 | 13 | 9.7   | 708.345  | 2 | 25.55 | 2 | 3999 | 3 | 165 | 177 2    |
| T.TPAN(+.98)DFVR.G               | 29.92 | 919.4399 | 8  | -1.2  | 460.7267 | 2 | 13.37 | 2 | 1778 | 1 | 220 | 227 2    |
| V.ALEVVTNVPSK.D                  | 29.52 | 1155.65  | 11 | -1.4  | 578.8314 | 2 | 16.56 | 2 | 2354 | 2 | 541 | 551      |
| G.SGGDVATFADGS                   |       |          |    |       |          |   |       |   |      |   |     |          |
| GR.E                             | 28.96 | 1295.574 | 14 | -11.1 | 648.7872 | 2 | 13.77 | 2 | 1845 | 1 | 99  | 112      |
| H.TNAGTQTGDITVR                  |       |          |    |       |          |   |       |   |      |   |     |          |
| .Y                               | 28.86 | 1332.663 | 13 | -6.2  | 667.3348 | 2 | 12.41 | 2 | 1614 | 1 | 478 | 490      |
| R.ELTTVHTTAA.N                   | 28.71 | 1042.53  | 10 | -4.7  | 522.2696 | 2 | 12.13 | 2 | 1564 | 1 | 113 | 122      |
| R.DM(+15.99)LGLVT                |       |          |    |       |          |   |       |   |      |   |     |          |
| DALKGEGYD.S                      | 27.7  | 1711.798 | 16 | -8.4  | 856.8988 | 2 | 21.26 | 2 | 3246 | 1 | 517 | 532 1    |
| K.ITAEGQDRIHLGT                  |       |          |    |       |          |   |       |   |      |   |     |          |
| FK.T                             | 27.54 | 1684.89  | 15 | -4.1  | 422.228  | 4 | 15.54 | 2 | 2167 | 1 | 561 | 575      |
| R.YM(+15.99)VEGVH                |       |          |    |       |          |   |       |   |      |   |     |          |
| TAWQ.S                           | 26.46 | 1335.592 | 11 | -11.9 | 668.7952 | 2 | 16.49 | 2 | 2341 | 1 | 491 | 501 1    |
| A.TVKPVLSTTAAK.                  |       |          |    |       |          |   |       |   |      |   |     |          |
| D                                | 26.23 | 1214.723 | 12 | -9.6  | 608.3632 | 2 | 14.35 | 2 | 1949 | 1 | 128 | 139      |
| K.NPTSANVLPANT                   |       |          |    |       |          |   |       |   |      |   |     |          |
| TY.V                             | 26.21 | 1560.778 | 15 | -11.4 | 781.3875 | 2 | 17.88 | 2 | 2619 | 1 | 316 | 330      |
| T.NPMISVQDFTVK.                  |       |          |    |       |          |   |       |   |      |   |     |          |
| V                                | 26.19 | 1377.696 | 12 | -7.5  | 689.8502 | 2 | 20.05 | 2 | 3026 | 1 | 415 | 426      |
| K.TSVTATTAVLQQT                  |       |          |    |       |          |   |       |   |      |   |     |          |
| AIGTAKAHA.K                      | 26.18 | 2140.149 | 22 | -10   | 714.3831 | 3 | 17.72 | 2 | 2588 | 1 | 28  | 49       |
| K.ADGTAAHAVAAD                   |       |          |    |       |          |   |       |   |      |   |     |          |
| .G                               | 25.95 | 1068.484 | 12 | -4.9  | 535.2464 | 2 | 9.71  | 2 | 1134 | 1 | 86  | 97       |
| D.ILDITDSQIR.F                   | 25.55 | 1172.64  | 10 | -7    | 587.3232 | 2 | 17.34 | 2 | 2502 | 1 | 204 | 213      |
| R.HTN(+.98)AGTQ(+.               |       |          |    |       |          |   |       |   |      |   |     |          |
| 98)TGDITVR.Y                     | 25.35 | 1471.69  | 14 | -0.1  | 736.8524 | 2 | 12.34 | 2 | 1601 | 1 | 477 | 490 2    |
| K.GTNPM(+15.99)ISV               |       |          |    |       |          |   |       |   |      |   |     |          |
| Q(+.98)DFTVK.V                   | 23.46 | 1552.744 | 14 | -2.9  | 777.3771 | 2 | 18.9  | 2 | 2809 | 1 | 413 | 426 1; 2 |
| V.FVYGGAK.I                      | 22.94 | 740.3857 | 7  | -5.8  | 371.198  | 2 | 15.66 | 2 | 2190 | 1 | 554 | 560      |
| R.ELTTVHTTAAN(+.                 |       |          |    |       |          |   |       |   |      |   |     |          |
| 98)AC(+57.02).L                  | 22.87 | 1388.624 | 13 | 8.2   | 695.3251 | 2 | 12.27 | 2 | 1589 | 1 | 113 | 125 2; 3 |

\* L = Length; F = Fraction; 1 - Oxidation (M); 2 - Deamidation (NQ); 3 - Carbamidomethylation

Table S3. Niche analysis of species/genomes with detected EAR28894 (Slr4) homologs.

| Protein sequence (accession #)                                                                             | Species                              | Marine | Host-associated | Fresh water | Habitat description                                                                   | Reference/Source                                                                                                                                                                          |
|------------------------------------------------------------------------------------------------------------|--------------------------------------|--------|-----------------|-------------|---------------------------------------------------------------------------------------|-------------------------------------------------------------------------------------------------------------------------------------------------------------------------------------------|
| WP_055732151.1                                                                                             | <i>Agarivorans gilvus</i>            | Yes    | Yes             |             | Seaweed                                                                               | <a href="https://www.ncbi.nlm.nih.gov/pubmed/20363930">https://www.ncbi.nlm.nih.gov/pubmed/20363930</a>                                                                                   |
| WP_026972292.1                                                                                             | <i>Aliagarivorans marinus</i>        | Yes    |                 |             | Seawater                                                                              | <a href="https://www.dsmz.de/catalogues/details/culture/DSM-23064.html">https://www.dsmz.de/catalogues/details/culture/DSM-23064.html</a>                                                 |
| WP_026957844.1                                                                                             | <i>Aliagarivorans taiwanensis</i>    | Yes    |                 |             | Seawater                                                                              | <a href="https://www.ncbi.nlm.nih.gov/pubmed/19567569">https://www.ncbi.nlm.nih.gov/pubmed/19567569</a>                                                                                   |
| WP_091340846.1                                                                                             | <i>Alkalimonas amylolytica</i>       | No     |                 | Yes         | Lake Chahannor in China                                                               | <a href="https://www.ncbi.nlm.nih.gov/pubmed/14986177">https://www.ncbi.nlm.nih.gov/pubmed/14986177</a>                                                                                   |
| WP_124748942.1                                                                                             | <i>Alteromonas facilis</i>           | Yes    | Yes             |             | Isolated from a sea cucumber culture pond in China                                    | <a href="https://www.ncbi.nlm.nih.gov/pubmed/30528643">https://www.ncbi.nlm.nih.gov/pubmed/30528643</a>                                                                                   |
| WP_046556214.1                                                                                             | <i>Arsukibacterium ikkense</i>       | Yes    |                 |             | Isolated from the alkaline, low-saline ikaite columns in the Ikka Fjord, SW Greenland | <a href="https://www.ncbi.nlm.nih.gov/pubmed/16790334">https://www.ncbi.nlm.nih.gov/pubmed/16790334</a>                                                                                   |
| WP_085282491.1                                                                                             | <i>Colwellia chukchiensis</i>        | Yes    |                 |             | Isolated from seawater samples from the Chukchi Sea in the Arctic Ocean               | <a href="https://www.ncbi.nlm.nih.gov/pubmed/20495042">https://www.ncbi.nlm.nih.gov/pubmed/20495042</a>                                                                                   |
| WP_085298075.1                                                                                             | <i>Colwellia mytili</i>              | Yes    | Yes             |             | Isolated from the mussel <i>Mytilus edulis</i> from the South Sea in Korea            | <a href="https://www.ncbi.nlm.nih.gov/pubmed/27902189">https://www.ncbi.nlm.nih.gov/pubmed/27902189</a>                                                                                   |
| WP_118961217.1                                                                                             | <i>Colwellia sp. RSH04</i>           | Yes    |                 |             | Seawater                                                                              | <a href="https://www.ebi.ac.uk/biosamples/samples/SAMN09916314">https://www.ebi.ac.uk/biosamples/samples/SAMN09916314</a>                                                                 |
| WP_057830656.1                                                                                             | <i>Colwellia sp. TT2012</i>          | Yes    |                 |             | Marine sediment, Pacific Ocean: the Tonga Trench                                      | <a href="https://www.ncbi.nlm.nih.gov/nucleotide/LJYX00000000.1">https://www.ncbi.nlm.nih.gov/nucleotide/LJYX00000000.1</a>                                                               |
| RLB69876.1                                                                                                 | <i>Deltaproteobacteria bacterium</i> | Yes    |                 |             | marine sediment hydrothermal vent sediments from dive 4571_4 depth 0-3 cm             | <a href="https://www.ncbi.nlm.nih.gov/protein/RLB69876.1">https://www.ncbi.nlm.nih.gov/protein/RLB69876.1</a>                                                                             |
| PCH94196.1,PC159289.1                                                                                      | <i>Gammaproteobacteria bacterium</i> | Yes    |                 |             | mediterranean seawater-France                                                         | <a href="https://www.uniprot.org/taxonomy/1805126">https://www.uniprot.org/taxonomy/1805126</a>                                                                                           |
| WP_040521162.1, WP_070111740.1                                                                             | <i>Glaciecola punicea</i>            | Yes    |                 |             | isolated from sea-ice cores collected from coastal areas of eastern Antarctica        | <a href="https://ijs.microbiologyresearch.org/content/journal/ijsem/10.1099/00207713-48-4-1213">https://ijs.microbiologyresearch.org/content/journal/ijsem/10.1099/00207713-48-4-1213</a> |
| GAB56998.1, PTB83247.1, PTB83248.1, PTB84530.1, PTB85125.1, PTB85126.1, RUO41646.1, RUO41647.1, RUO41648.1 | <i>Glaciecola punicea ACAM 611</i>   | Yes    |                 |             | Antarctic sea ice                                                                     | <a href="https://jlb.asm.org/content/194/12/3267">https://jlb.asm.org/content/194/12/3267</a>                                                                                             |
| WP_133538702.1                                                                                             | <i>Idiomarina aestuarii</i>          | Yes    |                 |             | isolation of the type strain from shallow coastal seawater.                           | <a href="https://ijs.microbiologyresearch.org/content/journal/ijsem/10.1099/ijms.0.022970-0">https://ijs.microbiologyresearch.org/content/journal/ijsem/10.1099/ijms.0.022970-0</a>       |
| WP_126834469.1                                                                                             | <i>Idiomarina aquatica</i>           | Yes    |                 |             | Isolated from salterns                                                                | <a href="https://ijs.microbiologyresearch.org/content/journal/ijsem/10.1099/ijsem.0.000619">https://ijs.microbiologyresearch.org/content/journal/ijsem/10.1099/ijsem.0.000619</a>         |
| WP_126834469.1                                                                                             | <i>Idiomarina aquimaris</i>          | Yes    | Yes             |             | isolated from the reef-building coral <i>Isopora palifera</i>                         | <a href="https://ijs.microbiologyresearch.org/content/journal/ijsem/10.1099/ijms.0.035592-0">https://ijs.microbiologyresearch.org/content/journal/ijsem/10.1099/ijms.0.035592-0</a>       |
| KFZ29179.1, WP_034731676.1                                                                                 | <i>Idiomarina atlantica</i>          | Yes    |                 |             | isolated from the deep sea sediment of the North Atlantic Ocean                       | <a href="https://link.springer.com/article/10.1007%2Fs10482-014-0337-7">https://link.springer.com/article/10.1007%2Fs10482-014-0337-7</a>                                                 |

|                                                                            |                                                       |     |     |                                                                                              |                                                                                                                                                                                                                                                                                                                                                                    |
|----------------------------------------------------------------------------|-------------------------------------------------------|-----|-----|----------------------------------------------------------------------------------------------|--------------------------------------------------------------------------------------------------------------------------------------------------------------------------------------------------------------------------------------------------------------------------------------------------------------------------------------------------------------------|
| RUO53158.1,WP_126763865.1,WP_126763868.1,WP_126763869.1                    | <i>Idiomarina halophila</i>                           | Yes |     | isolated from the sediment of the solar saltern pond located in Gomso, Republic of Korea     | <a href="https://www.microbiologyresearch.org/docs/erver/fulltext/ijsem/65/4/1268_ijs000094.pdf">https://www.microbiologyresearch.org/docs/erver/fulltext/ijsem/65/4/1268_ijs000094.pdf</a>                                                                                                                                                                        |
| RUO56263.1,WP_126771356.1,WP_126771358.1,WP_126771362.1                    | <i>Idiomarina homiensis</i>                           | Yes |     | isolated from seashore sand in Korea                                                         | <a href="https://www.microbiologyresearch.org/docs/erver/fulltext/ijsem/56/9/2229.pdf">https://www.microbiologyresearch.org/docs/erver/fulltext/ijsem/56/9/2229.pdf</a>                                                                                                                                                                                            |
| RUO62606.1,WP_126753970.1                                                  | <i>Idiomarina insulalsae</i>                          | Yes |     | isolated from a sea salt evaporation pond on the Island of Sal in the Cape Verde Archipelago | <a href="https://pdf.sciencedirectassets.com/273235/1-s2.0-S0723202009X00068/1-s2.0-S072320200900085X/main.pdf">https://pdf.sciencedirectassets.com/273235/1-s2.0-S0723202009X00068/1-s2.0-S072320200900085X/main.pdf</a>                                                                                                                                          |
| WP_026861598.1,WP_126775152.1                                              | <i>Idiomarina sediminum</i>                           | Yes |     | isolated from the soil of a sea salt evaporation pond                                        | <a href="https://www.microbiologyresearch.org/docs/erver/fulltext/ijsem/60/1/1.pdf">https://www.microbiologyresearch.org/docs/erver/fulltext/ijsem/60/1/1.pdf</a>                                                                                                                                                                                                  |
| HAD47721.1                                                                 | <i>Idiomarina sp.</i>                                 | Yes |     | marine metagenome                                                                            | <a href="https://www.ncbi.nlm.nih.gov/pubmed/30148503">https://www.ncbi.nlm.nih.gov/pubmed/30148503</a>                                                                                                                                                                                                                                                            |
| MBG23301.1                                                                 | <i>Idiomarinaceae bacterium</i>                       | Yes |     | marine metagenome from a Mediterranean Sea water sample                                      | <a href="https://www.ncbi.nlm.nih.gov/pubmed/29337314">https://www.ncbi.nlm.nih.gov/pubmed/29337314</a>                                                                                                                                                                                                                                                            |
| WP_088331539.1                                                             | <i>Lacimicrobium sp. SS2-24</i>                       | Yes | Yes | sediment from sea cucumber culture                                                           | <a href="https://www.ncbi.nlm.nih.gov/nucleotide/N1WW00000000.1">https://www.ncbi.nlm.nih.gov/nucleotide/N1WW00000000.1</a>                                                                                                                                                                                                                                        |
| WP_031571199.1                                                             | <i>Pararheinheimera texasensis</i>                    | No  | Yes | USA: Spring Lake; San Marcos; Texas                                                          | <a href="http://gtdb.ecogenomic.org/genomes?gid=GCF_000711985.1">http://gtdb.ecogenomic.org/genomes?gid=GCF_000711985.1</a>                                                                                                                                                                                                                                        |
| MBU77382.1                                                                 | <i>Pseudoalteromonas nadaceae bacterium</i>           | Yes |     | marine metagenome from a South Atlantic Ocean water sample                                   | <a href="https://www.ncbi.nlm.nih.gov/pubmed/29337314">https://www.ncbi.nlm.nih.gov/pubmed/29337314</a>                                                                                                                                                                                                                                                            |
| WP_077536094.1                                                             | <i>Pseudoalteromonas aliena</i>                       | Yes |     | Sea of Japan, Pacific Ocean                                                                  | <a href="https://www.ncbi.nlm.nih.gov/pubmed/15388692">https://www.ncbi.nlm.nih.gov/pubmed/15388692</a>                                                                                                                                                                                                                                                            |
| WP_010361438.1                                                             | <i>Pseudoalteromonas citrea</i>                       | Yes |     | Marine                                                                                       | <a href="https://www.ncbi.nlm.nih.gov/pubmed/12190022/">https://www.ncbi.nlm.nih.gov/pubmed/12190022/</a>                                                                                                                                                                                                                                                          |
| WP_091983032.1                                                             | <i>Pseudoalteromonas denitrificans</i>                | Yes |     | Marine                                                                                       | <a href="https://doi.org/10.1248/bpb.22.532">https://doi.org/10.1248/bpb.22.532</a>                                                                                                                                                                                                                                                                                |
| SFC52264.1                                                                 | <i>Pseudoalteromonas denitrificans DSM 6059</i>       | Yes |     | Marine                                                                                       | <a href="https://www.ncbi.nlm.nih.gov/Taxonomy/Browser/wwwtax.cgi?lvl=0&amp;id=43656">https://www.ncbi.nlm.nih.gov/Taxonomy/Browser/wwwtax.cgi?lvl=0&amp;id=43656</a> ,<br><a href="https://www.microbiologyresearch.org/docs/erver/fulltext/ijsem/37/4/ij3-37-4-416.pdf">https://www.microbiologyresearch.org/docs/erver/fulltext/ijsem/37/4/ij3-37-4-416.pdf</a> |
| KID36130.1                                                                 | <i>Pseudoalteromonas elyakovii</i>                    | Yes |     | isolated from marine environments                                                            | <a href="https://www.microbiologyresearch.org/docs/erver/fulltext/ijsem/53/1/125.pdf">https://www.microbiologyresearch.org/docs/erver/fulltext/ijsem/53/1/125.pdf</a>                                                                                                                                                                                              |
| CCQ10312.1                                                                 | <i>Pseudoalteromonas luteoviolacea B = ATCC 29581</i> | Yes |     | Marine                                                                                       | <a href="https://www.ncbi.nlm.nih.gov/pmc/articles/PMC3593315/">https://www.ncbi.nlm.nih.gov/pmc/articles/PMC3593315/</a>                                                                                                                                                                                                                                          |
| WP_010368594.1,WP_045962959.1,WP_045987911.1,WP_088531627.1,WP_117332793.1 | <i>Pseudoalteromonas piscicida</i>                    | Yes |     | found in the marine environment                                                              | <a href="https://www.ncbi.nlm.nih.gov/pubmed/28363962">https://www.ncbi.nlm.nih.gov/pubmed/28363962</a>                                                                                                                                                                                                                                                            |
| WP_119852593.1                                                             | <i>Pseudoalteromonas profundus</i>                    | Yes |     | isolated from a deep-sea seamount                                                            | <a href="https://www.ncbi.nlm.nih.gov/pubmed/27493151">https://www.ncbi.nlm.nih.gov/pubmed/27493151</a>                                                                                                                                                                                                                                                            |
| WP_022946007.1                                                             | <i>Pseudoalteromonas ruthenica</i>                    | Yes | Yes | isolated from marine invertebrates                                                           | <a href="https://www.microbiologyresearch.org/docs/erver/fulltext/ijsem/52/1/0520235a.pdf">https://www.microbiologyresearch.org/docs/erver/fulltext/ijsem/52/1/0520235a.pdf</a>                                                                                                                                                                                    |
| WP_130050461.1                                                             | <i>Pseudoalteromonas shioyasakiensis</i>              | Yes |     | isolated from Pacific Ocean sediment                                                         | <a href="https://www.ncbi.nlm.nih.gov/pubmed/24021728">https://www.ncbi.nlm.nih.gov/pubmed/24021728</a>                                                                                                                                                                                                                                                            |
| MAD02172.1                                                                 | <i>Pseudoalteromonas sp.</i>                          | Yes |     | marine metagenome from a Pacific Ocean water sample                                          | <a href="https://www.ncbi.nlm.nih.gov/pubmed/29337314">https://www.ncbi.nlm.nih.gov/pubmed/29337314</a>                                                                                                                                                                                                                                                            |
| MBD58444.1                                                                 | <i>Pseudoalteromonas sp.</i>                          | Yes |     | marine metagenome from an Indian Ocean water sample                                          | <a href="https://www.ncbi.nlm.nih.gov/pubmed/29337314">https://www.ncbi.nlm.nih.gov/pubmed/29337314</a>                                                                                                                                                                                                                                                            |

|                |                                              |     |     |                                                                          |                                                                                                                                               |
|----------------|----------------------------------------------|-----|-----|--------------------------------------------------------------------------|-----------------------------------------------------------------------------------------------------------------------------------------------|
| WP_042150686.1 | <i>Pseudoalteromonas</i> sp. '520P1 No. 412' | Yes |     | Marine                                                                   | <a href="https://mra.asm.org/content/2/6/e01346-14">https://mra.asm.org/content/2/6/e01346-14</a>                                             |
| WP_042150686.1 | <i>Pseudoalteromonas</i> sp. '520P1 No. 423' | Yes |     | Marine                                                                   | <a href="https://mra.asm.org/content/2/6/e01346-14">https://mra.asm.org/content/2/6/e01346-14</a>                                             |
| WP_069020791.1 | <i>Pseudoalteromonas</i> sp. BMB             | Yes | Yes | Isolated from gut of comb jelly                                          | <a href="https://www.uniprot.org/proteomes/UP000094131">https://www.uniprot.org/proteomes/UP000094131</a>                                     |
| WP_130151616.1 | <i>Pseudoalteromonas</i> sp. CO133X          | Yes | Yes | Octocoral                                                                | <a href="https://onlinelibrary.wiley.com/doi/full/10.1002/jobm.201800087">https://onlinelibrary.wiley.com/doi/full/10.1002/jobm.201800087</a> |
| WP_130151616.1 | <i>Pseudoalteromonas</i> sp. CO302Y          | Yes | Yes | Octocoral host-associated                                                | <a href="https://onlinelibrary.wiley.com/doi/full/10.1002/jobm.201800087">https://onlinelibrary.wiley.com/doi/full/10.1002/jobm.201800087</a> |
| WP_130126916.1 | <i>Pseudoalteromonas</i> sp. CO342X          | Yes |     | (Muricea sp.), Panama: Coiba National Park                               | <a href="https://www.ncbi.nlm.nih.gov/nuccore/1577351741">https://www.ncbi.nlm.nih.gov/nuccore/1577351741</a>                                 |
| WP_099029058.1 | <i>Pseudoalteromonas</i> sp. GCY             | Yes |     | Isolated from Northern Yellow Sea                                        | <a href="https://www.ncbi.nlm.nih.gov/nuccore/NZ_NHNM00000000.1">https://www.ncbi.nlm.nih.gov/nuccore/NZ_NHNM00000000.1</a>                   |
| WP_095726933.1 | <i>Pseudoalteromonas</i> sp. HM-SA03         | Yes | Yes | Source (marine), Host (Hapalochlaena), Location (Australia: Moreton Bay) | <a href="https://www.ncbi.nlm.nih.gov/nuccore/NZ_NSDG00000000.1">https://www.ncbi.nlm.nih.gov/nuccore/NZ_NSDG00000000.1</a>                   |
| WP_125251093.1 | <i>Pseudoalteromonas</i> sp. J010            | Yes | Yes | Isolated from surface of crustose coralline alga                         | <a href="https://www.ncbi.nlm.nih.gov/nuccore/NZ_RDBW00000000.1">https://www.ncbi.nlm.nih.gov/nuccore/NZ_RDBW00000000.1</a>                   |
| WP_086997608.1 | <i>Pseudoalteromonas</i> sp. JB197           | No  |     | Isolated from cheese rind                                                | <a href="https://www.ncbi.nlm.nih.gov/nuccore/NZ_NRGZ00000000.1">https://www.ncbi.nlm.nih.gov/nuccore/NZ_NRGZ00000000.1</a>                   |
| WP_119861005.1 | <i>Pseudoalteromonas</i> sp. MSK9-3          | Yes |     | Isolated from surface saline water                                       | <a href="https://www.ncbi.nlm.nih.gov/nuccore/NZ_MIET00000000.1">https://www.ncbi.nlm.nih.gov/nuccore/NZ_MIET00000000.1</a>                   |
| WP_017217139.1 | <i>Pseudoalteromonas</i> sp. NJ631           | Yes | Yes | Isolation source (ocean), host - Hymeniacion perleve (marine sponge)     | <a href="https://www.ncbi.nlm.nih.gov/nuccore/NZ_AKXJ00000000.1">https://www.ncbi.nlm.nih.gov/nuccore/NZ_AKXJ00000000.1</a>                   |
| WP_128731076.1 | <i>Pseudoalteromonas</i> sp. PS5             | Yes | Yes | Isolated from (host: Neogoniolithon solubile), USA: reef near Looe Key   | <a href="https://www.ncbi.nlm.nih.gov/nuccore/NZ_RCSQ00000000.1">https://www.ncbi.nlm.nih.gov/nuccore/NZ_RCSQ00000000.1</a>                   |
| WP_053910113.1 | <i>Pseudoalteromonas</i> sp. SW0106-04       | Yes |     | Seawater (Indian Ocean)                                                  | <a href="https://www.ebi.ac.uk/biosamples/samples/SAMD00039894">https://www.ebi.ac.uk/biosamples/samples/SAMD00039894</a>                     |

|                                   |                                     |     |     |     |                                                                                     |                                                                                                                                                                                           |
|-----------------------------------|-------------------------------------|-----|-----|-----|-------------------------------------------------------------------------------------|-------------------------------------------------------------------------------------------------------------------------------------------------------------------------------------------|
| WP_105171055.1                    | <i>Pseudoalteromonas sp. T1lg24</i> | Yes |     |     | Isolated from sea water (sediment depth)                                            | <a href="https://www.ncbi.nlm.nih.gov/nucleotide/NC_000000000.1">https://www.ncbi.nlm.nih.gov/nucleotide/NC_000000000.1</a>                                                               |
| WP_024611180.1                    | <i>Pseudoalteromonas sp. TB64</i>   | Yes | Yes |     | Isolated from a sponge, Antarctica                                                  | <a href="https://www.ncbi.nlm.nih.gov/nucleotide/NC_000000000.1">https://www.ncbi.nlm.nih.gov/nucleotide/NC_000000000.1</a>                                                               |
| WP_010561144.1,<br>WP_100912554.1 | <i>Pseudoalteromonas spongiae</i>   | No  | Yes | Yes | isolated from the surface of the sponge <i>Mycale adhaerens</i> in Hong Kong waters | <a href="https://www.ncbi.nlm.nih.gov/pubmed/16014487">https://www.ncbi.nlm.nih.gov/pubmed/16014487</a>                                                                                   |
| WP_009838156.1,<br>WP_119081635.1 | <i>Pseudoalteromonas tunicata</i>   | Yes |     |     | Marine organism originally isolated from tunicates                                  | <a href="https://www.ncbi.nlm.nih.gov/pubmed/9828422">https://www.ncbi.nlm.nih.gov/pubmed/9828422</a>                                                                                     |
| WP_086744222.1                    | <i>Pseudoalteromonas ulvae</i>      | Yes | Yes |     | Isolated from surface of marine alga                                                | <a href="https://www.ncbi.nlm.nih.gov/pubmed/11491351">https://www.ncbi.nlm.nih.gov/pubmed/11491351</a>                                                                                   |
| WP_134053939.1                    | <i>Rheinheimera aquimaris</i>       | Yes |     |     | isolated from seawater of the East Sea in Korea                                     | <a href="https://www.ncbi.nlm.nih.gov/pubmed/17625162">https://www.ncbi.nlm.nih.gov/pubmed/17625162</a>                                                                                   |
| WP_019674711.1                    | <i>Rheinheimera perlucida</i>       | Yes |     |     | Isolated from surface water from Baltic Sea                                         | <a href="https://www.ncbi.nlm.nih.gov/pubmed/16957117">https://www.ncbi.nlm.nih.gov/pubmed/16957117</a>                                                                                   |
| WP_132584183.1                    | <i>Rheinheimera sp. D18</i>         | Yes |     |     | Isolated from yellow sea (China)                                                    | <a href="https://www.ncbi.nlm.nih.gov/nucleotide/NC_0037745.1">https://www.ncbi.nlm.nih.gov/nucleotide/NC_0037745.1</a>                                                                   |
| WP_127697655.1                    | <i>Rheinheimera sp. KYPC3</i>       | No  |     | Yes | Isolated from freshwater stream                                                     | <a href="http://link.springer.com/443.webvpn.jxust.edu.cn/article/10.1007%2Fs00203-019-01657-5">http://link.springer.com/443.webvpn.jxust.edu.cn/article/10.1007%2Fs00203-019-01657-5</a> |
| WP_068063761.1                    | <i>Rheinheimera sp. SA_1</i>        | No  |     | Yes | isolated from "iron backwash sludge of a waterworks in Germany"                     | <a href="https://www.ncbi.nlm.nih.gov/pmc/articles/PMC4991719/">https://www.ncbi.nlm.nih.gov/pmc/articles/PMC4991719/</a>                                                                 |



|                                                                         |                                   |     |     |                                                          |                                                                                                                     |
|-------------------------------------------------------------------------|-----------------------------------|-----|-----|----------------------------------------------------------|---------------------------------------------------------------------------------------------------------------------|
| PHS21107.1                                                              | <i>Robiginitomaculum</i> sp.      | Yes |     | from Antarctic seawater                                  | <a href="http://www.bacterio.net/robiginitomaculum.html">http://www.bacterio.net/robiginitomaculum.html</a>         |
| WP_109338879.1                                                          | <i>Salinimonas</i> sp. HMF8227    | Yes |     | Isolated from saltern in South Korea                     | <a href="https://www.ncbi.nlm.nih.gov/nucleotide/CP029347.1">https://www.ncbi.nlm.nih.gov/nucleotide/CP029347.1</a> |
| WP_119977519.1                                                          | <i>Shewanella algidipiscicola</i> | Yes | Yes | isolated from marine fish of the Danish Baltic Sea       | <a href="https://www.ncbi.nlm.nih.gov/pubmed/17267977">https://www.ncbi.nlm.nih.gov/pubmed/17267977</a>             |
| WP_059744161.1                                                          | <i>Shewanella frigidimarina</i>   | Yes |     | Isolated from Antarctic coastal areas                    | <a href="https://www.ncbi.nlm.nih.gov/pubmed/11837303">https://www.ncbi.nlm.nih.gov/pubmed/11837303</a>             |
| WP_108947122.1                                                          | <i>Shewanella halifaxensis</i>    | Yes |     | Isolated from marine sediment                            | <a href="https://www.ncbi.nlm.nih.gov/pubmed/16403888">https://www.ncbi.nlm.nih.gov/pubmed/16403888</a>             |
| WP_115405978.1                                                          | <i>Shewanella putrefaciens</i>    | Yes | Yes | Associated with spoiled fish                             | <a href="https://www.ncbi.nlm.nih.gov/pubmed/2641275">https://www.ncbi.nlm.nih.gov/pubmed/2641275</a>               |
| WP_012143353.1                                                          | <i>Shewanella sediminis</i>       | Yes |     | Isolated from marine sediment                            | <a href="https://www.ncbi.nlm.nih.gov/pubmed/16014474">https://www.ncbi.nlm.nih.gov/pubmed/16014474</a>             |
| WP_076411007.1                                                          | <i>Shewanella</i> sp. UCD-KL12    | Yes | Yes | Isolated from seagrass                                   | <a href="https://www.ncbi.nlm.nih.gov/pubmed/28360178">https://www.ncbi.nlm.nih.gov/pubmed/28360178</a>             |
| WP_028771745.1                                                          | <i>Shewanella waksmanii</i>       | Yes | Yes | Marine strain isolated from sipuncula                    | <a href="https://www.ncbi.nlm.nih.gov/pubmed/13130035">https://www.ncbi.nlm.nih.gov/pubmed/13130035</a>             |
| WP_044830703.1                                                          | <i>Thalassomonas actiniarum</i>   | Yes | Yes | Isolated from marine animals                             | <a href="https://www.ncbi.nlm.nih.gov/pubmed/19329588/">https://www.ncbi.nlm.nih.gov/pubmed/19329588/</a>           |
| WP_044836570.1                                                          | <i>Thalassomonas viridans</i>     | Yes |     | isolated from oysters off the Mediterranean coast        | <a href="https://www.ncbi.nlm.nih.gov/pubmed/11491324">https://www.ncbi.nlm.nih.gov/pubmed/11491324</a>             |
| WP_115999569.1,<br>WP_116007234.1,<br>WP_116007235.1,<br>WP_116014431.1 | <i>Thalassotalea euphylliae</i>   | Yes | Yes | Isolated from coral                                      | <a href="https://www.ncbi.nlm.nih.gov/pubmed/27582443">https://www.ncbi.nlm.nih.gov/pubmed/27582443</a>             |
| WP_074500610.1                                                          | <i>Thalassotalea</i> sp. PP2-459  | Yes | Yes | Isolated from clam larvae in shellfish hatchery in Spain | <a href="https://www.ncbi.nlm.nih.gov/pubmed/23743010">https://www.ncbi.nlm.nih.gov/pubmed/23743010</a>             |

|                                   |                            |     |     |                                                         |                                                                                                                                                                 |
|-----------------------------------|----------------------------|-----|-----|---------------------------------------------------------|-----------------------------------------------------------------------------------------------------------------------------------------------------------------|
| WP_074191941.1                    | <i>Vibrio antiquarius</i>  | Yes |     | Isolated from deep sea hydrothermal vent                | <a href="https://www.pnas.org/content/112/21/E2813">https://www.pnas.org/content/112/21/E2813</a>                                                               |
| WP_104968991.1                    | <i>Vibrio diabolicus</i>   | Yes | Yes | Isolated from a deep-sea hydrothermal vent annelid worm | <a href="https://www.ncbi.nlm.nih.gov/pubmed/9336897">https://www.ncbi.nlm.nih.gov/pubmed/9336897</a>                                                           |
| WP_005434363.1                    | <i>Vibrio harveyi</i>      | Yes | Yes | Pathogen of marine vertebrates and invertebrates        | <a href="https://onlinelibrary.wiley.com/doi/abs/10.1111/j.1472-765X.2006.01989.x">https://onlinelibrary.wiley.com/doi/abs/10.1111/j.1472-765X.2006.01989.x</a> |
| WP_038864853.1,<br>WP_045422135.1 | <i>Vibrio jasicida</i>     | Yes | Yes | Isolated from marine vertebrates and invertebrates      | <a href="https://www.ncbi.nlm.nih.gov/pubmed/21984666">https://www.ncbi.nlm.nih.gov/pubmed/21984666</a>                                                         |
| WP_088881413.1                    | <i>Vibrio rotiferianus</i> | Yes | Yes | Marine pathogen                                         | <a href="https://www.ncbi.nlm.nih.gov/pmc/articles/PMC3133291/">https://www.ncbi.nlm.nih.gov/pmc/articles/PMC3133291/</a>                                       |
| WP_095760150.1                    | <i>Vibrio sp. V1B</i>      | Yes | Yes | Isolated from gut of saltwater clam                     | <a href="https://www.ncbi.nlm.nih.gov/pubmed/29051252">https://www.ncbi.nlm.nih.gov/pubmed/29051252</a>                                                         |

Table S4. Oligos used for plasmid construction

| Oligo ID | Sequence                                                |
|----------|---------------------------------------------------------|
| JC467    | TCAGTTTCATGAACTTGGAGAATGCTGCAGTAAGCAACCGCTAAGTTTAAGTAGT |
| JC468    | ACTACTTAACTTAGCGGTTGCTTACTGCAGCATTCTCCAAGTTTCATGAACTGA  |
| JC470    | CGGCAGGCTTAACTTGCTGCGTT                                 |
| JC491    | GCGGGATCCAAACAATTATTTTAGGTGGTTTAATTAG                   |
| JC492    | GCGCAAGCTTGCCGATTAATGGACCAAGTGTCAAC                     |

## Supplementary Text

### >Protein PTD2\_07619 (EAR28894)

MEIMFKKTLALAITGVSVAANAAVVKTSTATTAVLQOTAIGTAKAHAKGTALGASGVFGTAADATNSANCKALAA  
FYGVSLTKADGTAHAVAADGSGGDVATFADGSGRELTTVHTTAANACLATVKPVLSTTAAKDGLEYTQATALEIKP  
VIVAGIGGYKAEDTLTFQFSGAKLDLTKTTAPSITVAAAGQAGAGVTFDILDITDSQIRFTVKATTPANDFVRNGI  
LELSNIFLDSTGLAATTSVMVNSFGTNTSGTKFDESTAATIVSLLPQYTTTEVTTLLDADIDVGKDRQQFANNLTADV  
LAVKHTKNPTSANVLPANTTYVVVTGDFSWAYAPSVDTNKDGKLSAELMAANVAVLAGGDDTVKSLALNATNTELT  
IVTNIVGAALDATNTITFNVPGYDSGKGTNPMISVQDFTVKVDTMSDKSVGSKAVNMPSLAKTAAGTWKLNGSVVVV  
PYVPFGPATQPIRLRHTNAGTQTGDITVRYMVEGVHTAWQSLAAAGIKDAKPGVRDMLGLVTDALKEGYDSTTTGFK  
VALEVVTNVPKDVVYGGAKITAEGQDRIHLGTFKTNVN

### >PTD2\_07619 (EAR28894) deletion/replacement

MHQ

### >PTD2\_07619 (EAR28894) gene

ATGGAAATTATGTTCAAGAAAACCTACTACTAGCACTAGCAATTACTGGTGTCTTCTGTAGCAGCTAATGCAGCTGTGGT  
AAAAACAAGCGTAACAGCAACTACTGCTGTTTTACAACAACAGCAATTGGTACTGCTAAAGCTCACGCTAAAGGTA  
CTGCTCTAGGTGCTTCTGGTGTGTTCCGGTACAGCTGCAGATGCAACAAATTCAGCTAACTGTAAAGCATTAGCTGCT  
TTTTATGGTGTTCATTAATAAGCTGATGGTACAGCTGCTCACGCTGTTGCTGCTGATGGTTCAGGTGGCGACGT  
AGCTACTTTTGTGCTGATGGTTCAGGTGCTGAATTAACAACAGTACACACTACAGCTGCTAATGCTTGTCTTGCAACTG  
TTAAACCAGTCTTTCTACTACCGCTGCTAAAGATGGTCTTGAGTACACTCAAGCTACAGCACTGAAATTAACCA  
GTTATTGTTGCTGGTATCCGGTGGTTACAAAGCTGAAGATACGTTAACGTTCCAATCTCTGGCGCTAAATTAGATTT  
AATAAACAACACTGCTCCATCTATTACTGTTGCAGCAGCTGGTCAAGCTGGTGTGCTGGTGTGACATTTGATATCCTTG  
ATATCACTGATTACAAAATTCGTTTCACCGTTAAAGCAACTACTCCAGCGAATGATTTTTGTTTCGTGGTAACGGTATT  
TTAGAATTAAGCAACATCTTCCTAGATTCTACAGGTCTTGCTGCTACTACTTCTGTAATGGTTAATTCTTTTGGTAC  
TAATACATCAGGTACTAAATTTGATGAATCAACAGCTGCAACGATTGTATCTTTACTTCCACAATACACTACAGAAG  
TAACTACGTTACTTGTATGCAGATATCGATGTAGGTAAAGATCGTCAACAATTTGCTAACAACCTAACAGCTGATGTT  
TTAGCTGTTAAACACACTAAAAACCAACATCTGCTAACGTATTAGTTCCTGCTAATAACAACCTTATGTTGTTACTGG  
TGATTTCTCTTGGGCTTATGCGCCAAGCGTAGATACAAACAAGATGGCAAATTATCTTCAGCTGAGTTAATGGCTG  
CGAATGTTGCTGTTTTAGCTGGTGGTGTATGATACAGTTAAGTCTTTAGCTCTTAATGCTACAAACACTGAATTAACA  
ATTGTTACTAATATTGTTGGTGTGCTGCATTAGATGCAACTAACACTATTACATTCAATGTTCCAGGCTATGATTCAGG  
TAAAGGCACTAACCAATGATTTCTGTTCAAGATTTTCACGGTTAAAGTTGATACTATGTCTGATAAATCAGTTGGTA  
GCAAAGCTGTAAACATGCCATCACTTGCTAAAACAGCAGCTGGTACATGGAAATTAATGGTTCTGTTGTTGTTGTT  
CCTTATGTTCCATTTGGTCCAGCTACACAACCAATTTTACGCCACACTAATGCTGGTACACAAACCTGGTGTATACAC  
AGTTCGTTACATGGTTGAAGGTGTTACACTGCATGGCAATCACTTGCAGCAGCTGGCATCAAAGATGCAAAACCTG  
CCGTACGTGATATGTTAGGCTAGTAACTGACGCACCTAAAGGTGAAGGTTATGACTCTACAACACTACTGGCTTCAAA  
GTAGCTTTAGAAGTTGTAACCTAACGTTCTTCAAAGACGTGTTTCGTATACGGCGGCGCTAAAATCACTGCTGAAGG  
TCAAGATCGTATCCATTTAGGTACTTTCAAACCTAACGTAAACTAA

### > PTD2\_07619 (EAR28894) deletion/replacement

ATGCTGCAGTAA
